# Supplementary material for: Systematic Review of Pediatric Functional Gastrointestinal Disorders (Rome IV Criteria)
Source: MDPI journal article supplement (doi:10.3390/jcm10215087), 2021-10-29
Supplement: s1 [file s1]

Table S1: Risk of bias assessment for included articles

✓ = One point scored, ● = Half point scored, ✕ = Zero points scored

<sup>a</sup> = full article, <sup>b</sup> = conference abstract

|                               | Validity of study methods |                   |             |                   |                   | Results interpretation |                    | Applicability of results |                  |
|-------------------------------|---------------------------|-------------------|-------------|-------------------|-------------------|------------------------|--------------------|--------------------------|------------------|
| First Author                  | Population sampling       | Location sampling | Sample size | Standard Measures | Unbiased assessor | Confidence intervals   | Complete reporting | Study subjects           | Quality Score    |
| Aydemir <sup>12</sup>         | ✕                         | ✕                 | ✕           | ✓                 | ✓                 | ✓                      | ✓                  | ✕                        | 4 <sup>a</sup>   |
| Beser <sup>13</sup>           | ✓                         | ✕                 | ✓           | ✓                 | ✓                 | ✕                      | ✕                  | ✕                        | 4 <sup>b</sup>   |
| Chanis <sup>15</sup>          | ✓                         | ✕                 | ✕           | ✓                 | ✓                 | ✕                      | ✓                  | ✓                        | 5 <sup>b</sup>   |
| Chew <sup>16</sup>            | ✓                         | ●                 | ✓           | ✓                 | ✓                 | ✓                      | ✓                  | ✓                        | 7.5 <sup>a</sup> |
| Chikunov <sup>17</sup>        | ✓                         | ✕                 | ✓           | ✓                 | ✕                 | ✕                      | ✓                  | ✕                        | 4 <sup>b</sup>   |
| Ekinici <sup>18</sup>         | ✕                         | ✕                 | ✕           | ✓                 | ✓                 | ✕                      | ✓                  | ✓                        | 4 <sup>a</sup>   |
| Ekinici <sup>19</sup>         | ✕                         | ✕                 | ✓           | ✓                 | ✕                 | ✕                      | ✓                  | ✓                        | 4 <sup>a</sup>   |
| Jativa-Marino <sup>20</sup>   | ✓                         | ✓                 | ✓           | ●                 | ✓                 | ✕                      | ✕                  | ✓                        | 5.5 <sup>a</sup> |
| Llanos-Chea <sup>21</sup>     | ✓                         | ●                 | ✓           | ✓                 | ✓                 | ✕                      | ✕                  | ✕                        | 4.5 <sup>b</sup> |
| Ozdemir <sup>22</sup>         | ✓                         | ✕                 | ✓           | ✓                 | ✕                 | ✕                      | ✕                  | ✕                        | 3 <sup>b</sup>   |
| Robin <sup>23</sup>           | ●                         | ✓                 | ✓           | ✓                 | ✓                 | ✕                      | ✓                  | ✓                        | 6.5 <sup>a</sup> |
| Saps <sup>24</sup>            | ✓                         | ✓                 | ✓           | ✓                 | ✓                 | ✕                      | ✓                  | ✓                        | 7 <sup>a</sup>   |
| Saps <sup>25</sup>            | ✓                         | ✕                 | ✓           | ✓                 | ✓                 | ✕                      | ✕                  | ✓                        | 5 <sup>a</sup>   |
| Steutel <sup>26</sup>         | ✓                         | ●                 | ✓           | ✓                 | ✓                 | ✓                      | ✓                  | ✓                        | 7.5 <sup>a</sup> |
| Velasco-Benitez <sup>27</sup> | ✓                         | ✕                 | ✓           | ✓                 | ✓                 | ✕                      | ✕                  | ✓                        | 5 <sup>b</sup>   |
| Velasco-Benitez <sup>28</sup> | ✓                         | ✕                 | ✓           | ✓                 | ✓                 | ✕                      | ✕                  | ✓                        | 5 <sup>b</sup>   |
| Velasco-Benitez <sup>29</sup> | ✓                         | ✓                 | ✓           | ✓                 | ✓                 | ✕                      | ✓                  | ✓                        | 7 <sup>a</sup>   |
| Velasco-Benítez <sup>30</sup> | ✓                         | ✓                 | ✓           | ✓                 | ✓                 | ✕                      | ✓                  | ✓                        | 7 <sup>a</sup>   |
| Vlad <sup>31</sup>            | ✓                         | ●                 | ✓           | ●                 | ✕                 | ✕                      | ✓                  | ✕                        | 4 <sup>b</sup>   |
| Zeevenhooven <sup>32</sup>    | ✕                         | ✕                 | ✕           | ✓                 | ✓                 | ✓                      | ✓                  | ✓                        | 5 <sup>b</sup>   |

**Population sampling** - Is the population sampling method appropriate for the research question?

*Scores:* Random or whole population sampling = 1 point, selecting respondents within these methods = 0.5 point

**Location sampling** - Is the sampling location appropriate for the general population?

*Scores:* Regional sampling = 1 point, Sampling from more than one general health clinic = 0.5 point

**Sample size adequate** - Is the sample size adequate? Determined by previous work among children showing FGID prevalence at approximately 30%<sup>8,9</sup>, therefore, a minimal sample size of 150 could get adequate precision of FGID prevalence.

*Scores:* Sample size greater than 150 = 1 point

**Standard measures** - Are objective criteria used for measuring the health outcome, with appropriate validation?

*Scores:* English Rome IV criteria, or translation carried out with appropriate methodology = 1 point, translated Rome IV if methodology not stated or validation not carried out = 0.5 point.

**Un-biased assessor** - Is the health outcome measured in a non-biased fashion?

*Scores:* Study reported who completed Rome IV = 1 point

**Confidence intervals** - Are the results presented with confidence intervals for their estimates?

*Scores:* Confidence intervals reported = 1 point

**Complete reporting** - Is there complete reporting of all results?

*Scores:* Complete reporting of data (including 'zero' if no participants) = 1 point

**Study subjects** - Are study subjects sufficiently described?

*Scores:* Reporting age and gender distribution for study population = 1 point
