# Supplementary material for: Systematic Review of Pediatric Functional Gastrointestinal Disorders (Rome IV Criteria)
Source: J Clin Med. 2021 Oct 29;10(21):5087. doi: 10.3390/jcm10215087 (PMC8585107; doi:10.3390/jcm10215087)
Supplement: Supplementary file 1 [file jcm-10-05087-s001.zip]

Archive with 4 entries (4 files):
- AVR_Figure S1.jpg
- AVR_Figure S2.jpg
- AVR_Table S1.pdf
- Checklist S1.pdf
